# Supplementary material
Source: PubMed Central journal article supplement (PMC5876913)

## Supplementary Online Content

Kandathil CK, Spataro EA, Laimi K, Moubayed SP, Most SP, Saltychev M.  
Repair of the lateral nasal wall in nasal airway obstruction: a systematic review  
and meta-analysis. Published online March 15, 2018. *JAMA Facial Plast Surg*.  
doi:10.1001/jamafacial.2018.0036

**eFigure 1.** Analysis of short-term follow-up (up to 3 months) on 206 participants

**eFigure 2.** The pooled effect at 3 to 6 months postoperatively on 128 participants

**eFigure 3.** The pooled effect over 6 months postoperatively of 110 participants

This supplementary material has been provided by the authors to give readers  
additional information about their work.

**eFigure 1.** Analysis of short-term follow-up (up to 3 months) on 206 participants

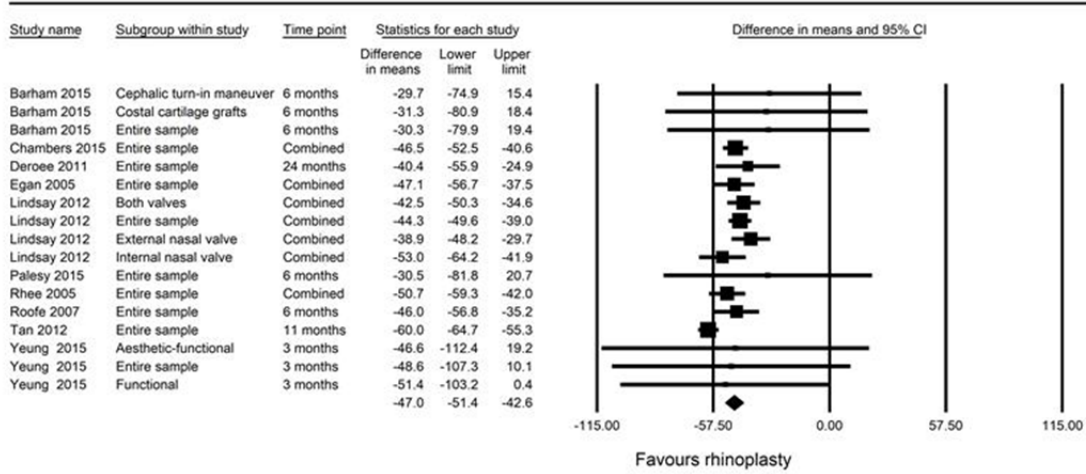

**eFigure 2.** The pooled effect at 3 to 6 months postoperatively on 128 participants

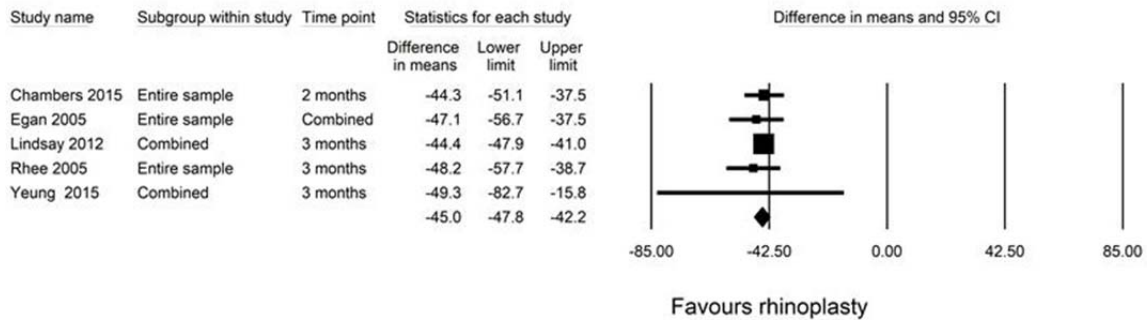

**eFigure 3.** The pooled effect over 6 months postoperatively of 110 participants

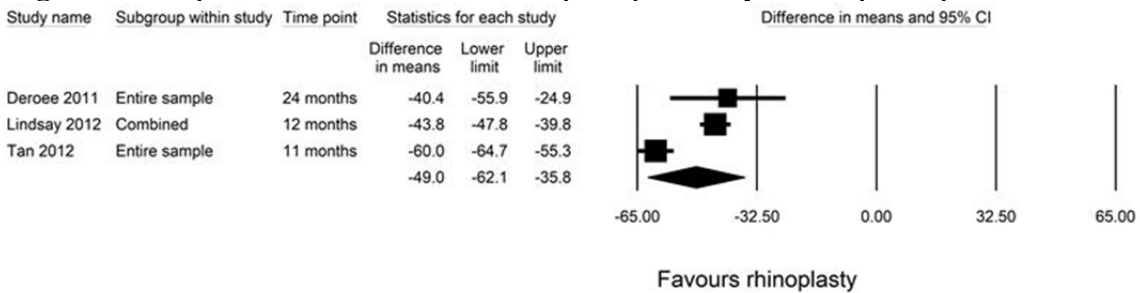

Supplement: jamafacialplastsurg-20-307-s001.pdf [file jamafacialplastsurg-20-307-s001.pdf]
